# Supplementary material
Source: publisher figshare collection journal article supplement (https://frontiersin.figshare.com/ndownloader/files/31086457)
Supplement: Supplementary file [file 31086457]

**Supplementary Table S1** Summary of the differences between the German credit data and the South German credit data.

| variable            | level.new                                   | level.old                                         | good | bad  |
|---------------------|---------------------------------------------|---------------------------------------------------|------|------|
| status              | 0<= ... < 200 DM                            | ... >= 200 DM / salary for at least 1 year        | 0.07 | 0.05 |
| status              | no checking account                         | ... < 100 DM                                      | 0.20 | 0.45 |
| status              | ... < 0 DM                                  | 0 <= ... < 200 DM                                 | 0.23 | 0.35 |
| status              | ... >= 200 DM / salary for at least 1 year  | no checking account                               | 0.50 | 0.15 |
| credit_history      | delay in paying off in the past             | no credits taken/all credits paid back duly       | 0.02 | 0.08 |
| credit_history      | critical account/other credits elsewhere    | all credits at this bank paid back duly           | 0.03 | 0.09 |
| credit_history      | existing credits paid back duly till now    | delay in paying off in the past                   | 0.09 | 0.09 |
| credit_history      | all credits at this bank paid back duly     | critical account/other credits existing           | 0.35 | 0.17 |
| credit_history      | no credits taken/all credits paid back duly | existing credits paid back duly till now          | 0.52 | 0.56 |
| savings             | 500 <= ... < 1000 DM                        | ... >= 1000 DM                                    | 0.06 | 0.02 |
| savings             | 100 <= ... < 500 DM                         | 500 <= ... < 1000 DM                              | 0.07 | 0.04 |
| savings             | ... < 100 DM                                | 100 <= ... < 500 DM                               | 0.10 | 0.11 |
| savings             | ... >= 1000 DM                              | unknown/no savings account                        | 0.22 | 0.11 |
| savings             | unknown/no savings account                  | ... < 100 DM                                      | 0.55 | 0.72 |
| personal_status_sex | male : divorced/separated                   | male : divorced/separated                         | 0.04 | 0.07 |
| personal_status_sex | female : single                             | male : married/widowed                            | 0.10 | 0.08 |
| personal_status_sex | female : non-single or male : single        | female : divorced/separated/married               | 0.29 | 0.36 |
| personal_status_sex | male : married/widowed                      | male : single                                     | 0.57 | 0.49 |
| property            | real estate                                 | unknown/no property                               | 0.12 | 0.22 |
| property            | car or other                                | building society savings agreement/life insurance | 0.23 | 0.24 |
| property            | unknown / no property                       | real estate                                       | 0.32 | 0.20 |
| property            | building soc. savings agr/life insurance    | car or other                                      | 0.33 | 0.34 |
| housing             | own                                         | for free                                          | 0.09 | 0.15 |
| housing             | for free                                    | rent                                              | 0.16 | 0.23 |
| housing             | rent                                        | own                                               | 0.75 | 0.62 |
| foreign_worker      | yes                                         | no                                                | 0.05 | 0.01 |
| foreign_worker      | no                                          | yes                                               | 0.95 | 0.99 |
| installment_rate    | >= 35                                       | 1                                                 | 0.15 | 0.11 |
| installment_rate    | 20 <= ... < 25                              | 3                                                 | 0.16 | 0.15 |
| installment_rate    | 25 <= ... < 35                              | 2                                                 | 0.24 | 0.21 |
| installment_rate    | < 20                                        | 4                                                 | 0.45 | 0.53 |
| present_residence   | < 1 yr                                      | 1                                                 | 0.13 | 0.12 |
| present_residence   | 4 <= ... < 7 yrs                            | 3                                                 | 0.15 | 0.14 |
| present_residence   | 1 <= ... < 4 yrs                            | 2                                                 | 0.30 | 0.32 |
| present_residence   | >= 7 yrs                                    | 4                                                 | 0.41 | 0.41 |
| number_credits      | >= 6                                        | 4                                                 | 0.01 | 0.01 |
| number_credits      | 4-5                                         | 3                                                 | 0.03 | 0.02 |
| number_credits      | 2-3                                         | 2                                                 | 0.34 | 0.31 |
| number_credits      | 1                                           | 1                                                 | 0.62 | 0.67 |
| people_liable       | 3 or more                                   | 2                                                 | 0.16 | 0.15 |
| people_liable       | 0 to 2                                      | 1                                                 | 0.84 | 0.85 |
